# Supplementary material for: Investigation of the Influence of PLA Molecular and Supramolecular Structure on the Kinetics of Thermal-Supported Hydrolytic Degradation of Wet Spinning Fibres
Source: MDPI journal article supplement (doi:10.3390/ma13092111), 2020-05-02
Supplement: s1 [file s1]

Supplementary Files

# Investigation of the Influence of PLA Molecular and Supramolecular Structure on the Kinetics of Thermal-Supported Hydrolytic Degradation of Wet Spinning Fibres

Małgorzata Giełdowska, Michał Puchalski, Grzegorz Szparaga and Izabella Krucińska

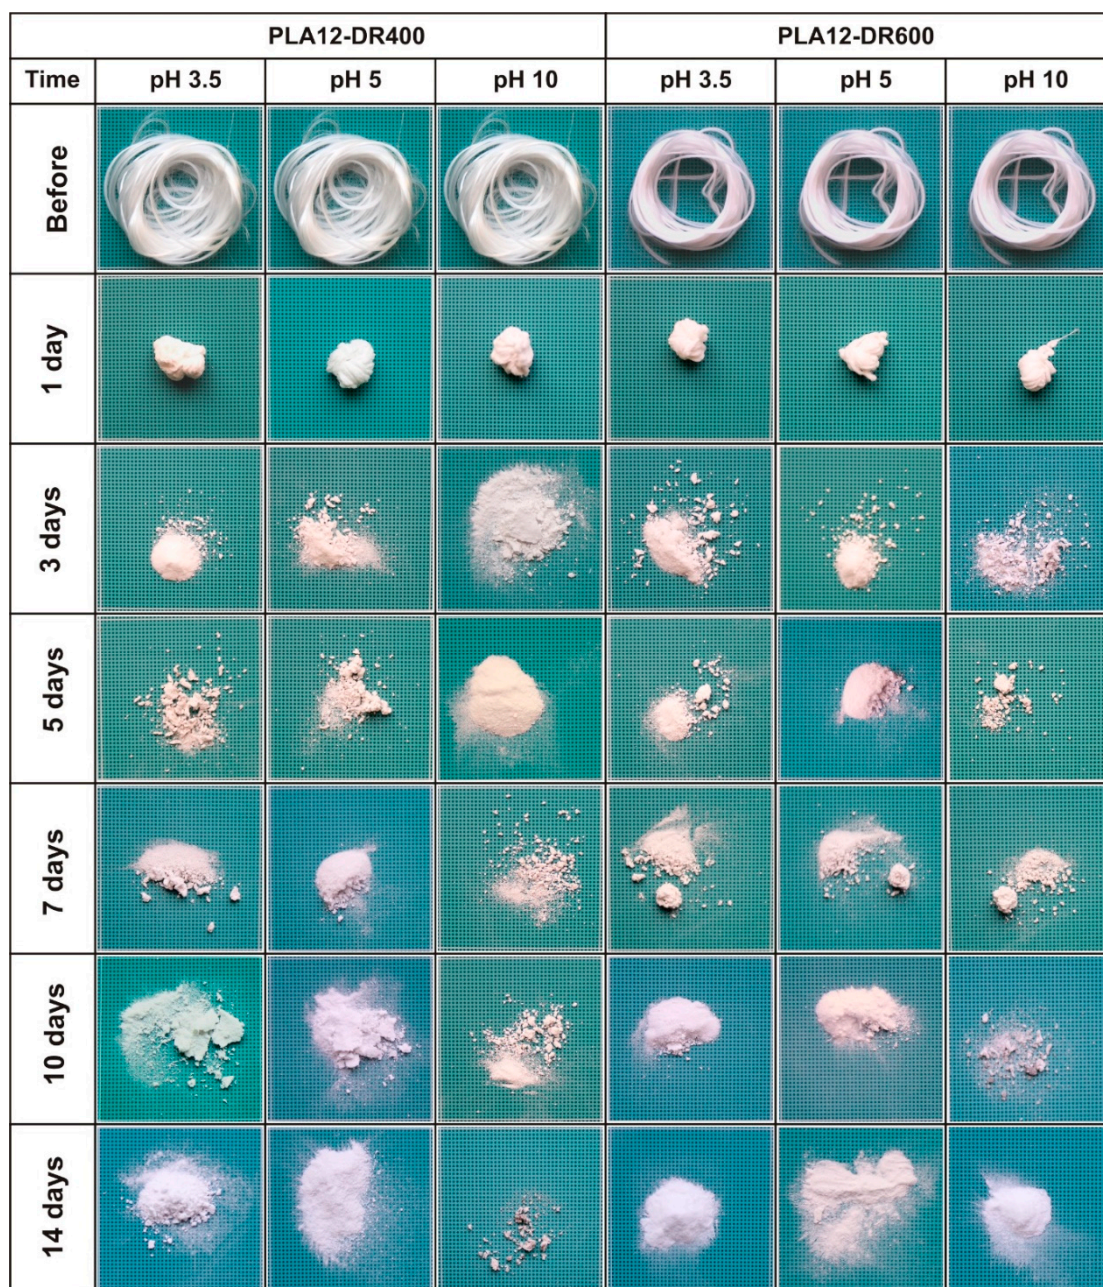

**Figure S1. Photographic documentation of thermal-supported hydrolytic degradation of fibres obtained from PLA containing 12% D-lactide isomer.**

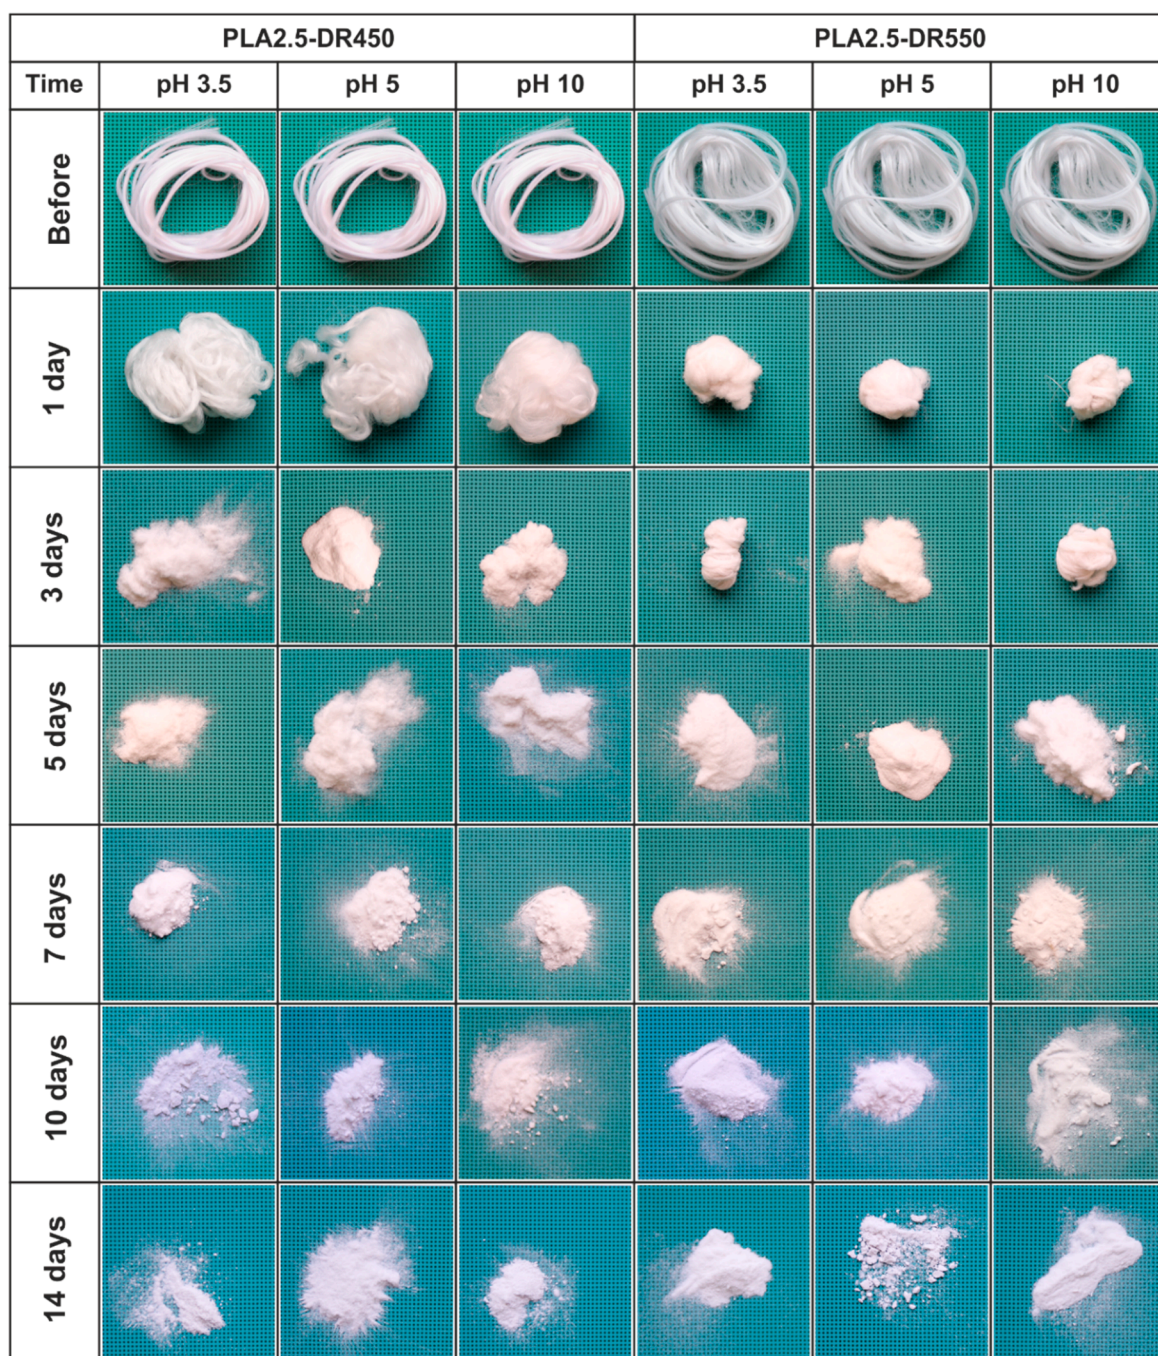

**Figure S2. Photographic documentation of thermal-supported hydrolytic degradation of fibres obtained from PLA containing 2.5% D-lactide isomer.**

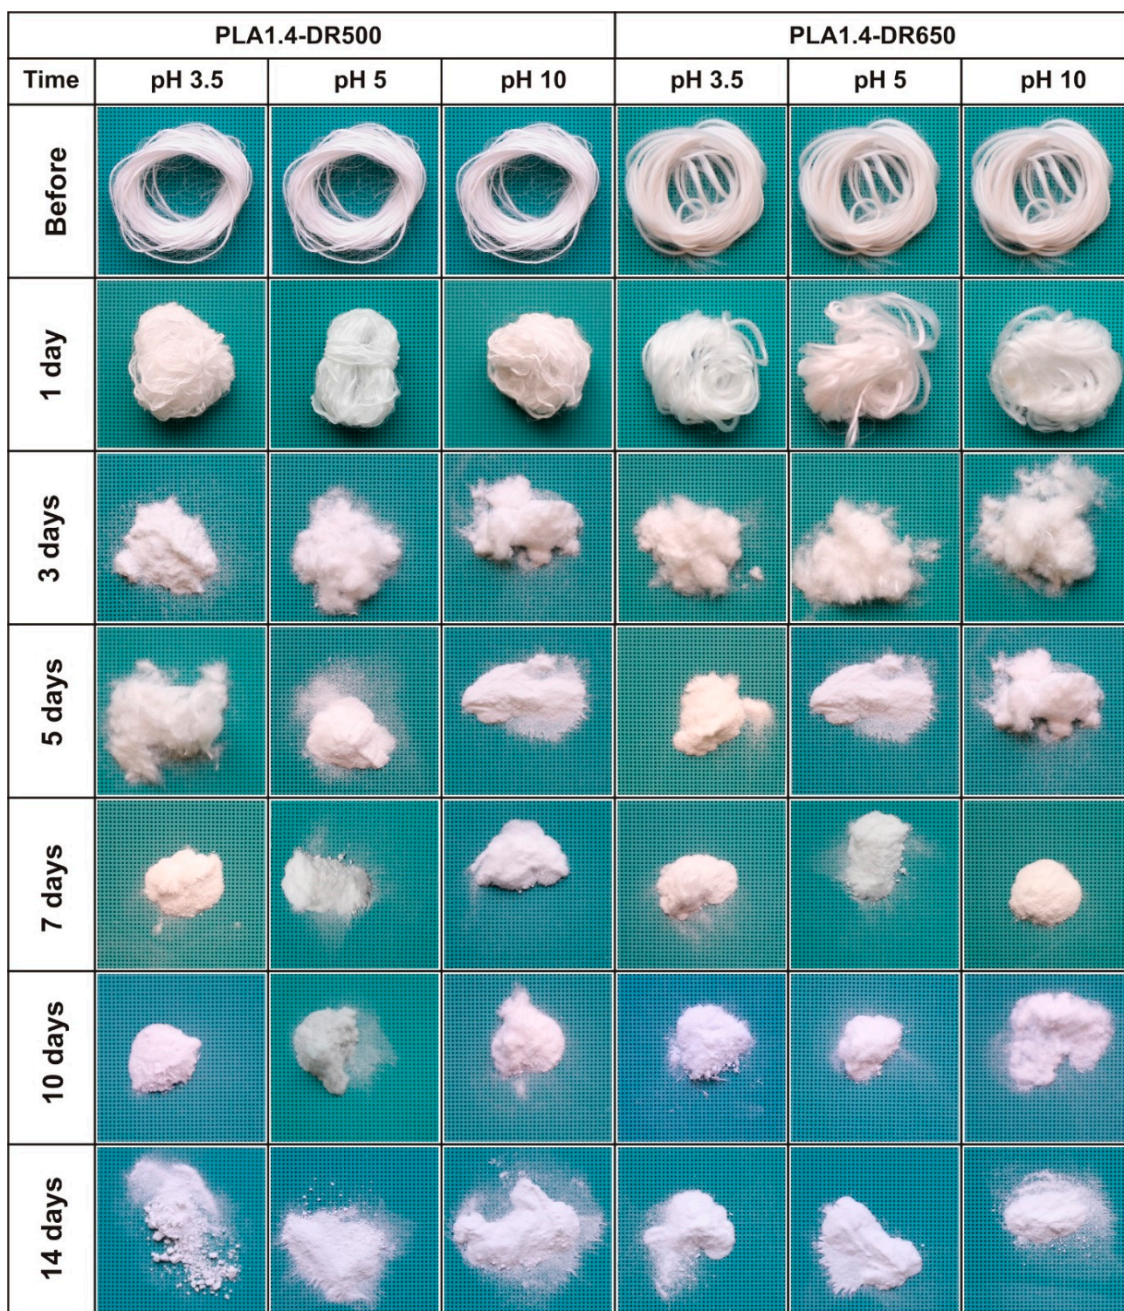

**Figure S3. Photographic documentation of thermal-supported hydrolytic degradation of fibres obtained from PLA containing 1.4% D-lactide isomer.**
